# Supplementary material for: Serum Levels of Urokinase Plasminogen Activator Receptor (suPAR) Discriminate Moderate Uncontrolled from Severe Asthma
Source: MDPI journal article supplement (doi:10.3390/jpm12111776), 2022-10-28
Supplement: s1 [file s1]

Supplementary Table S1. Correlation analysis between suPAR levels and age, BMI, T2 biomarkers, blood cell count, CRP, electrolytes, and parameters of the kidney and liver function

|               | Age (years)         | FeNO (ppb) | FEV1 / FVC | Eosinophils (%) | Absolut eosinophil count (cells / $\mu$ L) | White blood cell count (cells / $\mu$ L) | CRP (mg/dL) | Urea (mg/dL) | Cr (mg/dL) | AST (mg/dL) | ALT (mg/dL) | $\gamma$ GT (mg/dL) | K (mEq/L) | Na(mEq/L) | BMI (kg/m2) |       |
|---------------|---------------------|------------|------------|-----------------|--------------------------------------------|------------------------------------------|-------------|--------------|------------|-------------|-------------|---------------------|-----------|-----------|-------------|-------|
| suPAR (ng/mL) | Pearson Correlation | 0.140      | -0.144     | 0.020           | -0.037                                     | -0.016                                   | -0.576      | 0.050        | 0.131      | -0.610      | -0.086      | -0.091              | -0.070    | -0.020    | -0.028      | 0.079 |
|               | Sig. (2-tailed)     | 0.238      | 0.309      | 0.870           | 0.767                                      | 0.895                                    | 0.424       | 0.688        | 0.700      | 0.582       | 0.751       | 0.738               | 0.574     | 0.890     | 0.908       | 0.646 |

Abbreviations: ALT, alanine transaminase; AST, aspartate transaminase; BMI, body mass index; Cr, creatinine; CRP, c-reactive protein; FeNO, fractional exhaled nitric oxide; FeV1/FVC, forced expiratory volume in the first second / force vital capacity;  $\gamma$ GT, gamma-Glutamyl Transpeptidase; K, potassium; Na, sodium
